# Supplementary material for: Lactobacilli as a Vector for Delivery of Nanobodies against Norovirus Infection
Source: Pharmaceutics. 2022 Dec 25;15(1):63. doi: 10.3390/pharmaceutics15010063 (PMC9863548; doi:10.3390/pharmaceutics15010063)
Supplement: Supplementary file 1 [file pharmaceutics-15-00063-s001.zip › pharmaceutics-2069149-supplementary.pdf]

**Table S1. Bacterial strains and plasmids used in this study.**

| Strains or plasmids            | Characteristics                                                                                                                                                                                                 | Source     |
|--------------------------------|-----------------------------------------------------------------------------------------------------------------------------------------------------------------------------------------------------------------|------------|
| <b>Strains</b>                 |                                                                                                                                                                                                                 |            |
| <i>E. coli</i> DH5 $\alpha$    | F <sup>-</sup> $\phi$ 80/ <i>lacZ</i> $\Delta$ M15 $\Delta$ ( <i>lacZYA-argF</i> ) U169 <i>recA1 endA1 hsdR17</i> (rK <sup>-</sup> , mK <sup>+</sup> ) <i>phoA supE44</i> $\lambda^-$ <i>thi-1 gyrA96 relA1</i> | Invitrogen |
| <i>L. paracasei</i> BL23       | Previously known as <i>L. zeae</i> ATCC 393 pLZ15 <sup>-</sup>                                                                                                                                                  | [13]       |
| <i>L. paracasei</i> BL23-pIAV7 | <i>L. paracasei</i> BL23 harboring pAF900                                                                                                                                                                       | [19]       |
| <i>L. paracasei</i> BL23-1E4   | <i>L. paracasei</i> BL23 harboring pAF900-1E4                                                                                                                                                                   | This study |
| <b>Plasmids</b>                |                                                                                                                                                                                                                 |            |
| pIAV7                          | Broad-range vector, <i>Erm</i> , <i>lacZ</i> , pWV01 replication origin                                                                                                                                         | [17]       |
| pAF900                         | Surface-anchored (anchor domain 243-aa PrtP of <i>L. paracasei</i> BL23) scFv anti-SAI/II in pIAV7                                                                                                              | [19]       |
| pAF900-1E4                     | pAF900 inserted with 1E4 expression cassette                                                                                                                                                                    | This study |

**Table S2. *Lactobacillus paracasei* BL23-pIAV7 (negative control) or BL23-1E4 collected from the feces of germ-free mice after oral administration**

|       | <b>BL23-pIAV7</b>                                   | <b>BL23-1E4</b>                                     |
|-------|-----------------------------------------------------|-----------------------------------------------------|
| 8 h   | $5.14 \times 10^6$ cfu/ml<br>$\pm 2.08 \times 10^5$ | $5.53 \times 10^5$ cfu/ml<br>$\pm 1.38 \times 10^5$ |
| 72 h  | $9.94 \times 10^6$ cfu/ml<br>$\pm 4.38 \times 10^5$ | $3.14 \times 10^6$ cfu/ml<br>$\pm 4.98 \times 10^5$ |
| 240 h | $3.13 \times 10^5$ cfu/ml<br>$\pm 1.31 \times 10^5$ | $1.87 \times 10^5$ cfu/ml<br>$\pm 1.08 \times 10^5$ |

Samples of feces (0.1 g) collected from germ-free mice at the indicated times after their oral administration *with L. paracasei* BL23-pIAV7 or BL-23-1E4 were suspended in 1 ml PBS and then further diluted 2000-fold in PBS; 100 µl of this final dilution was spread on a MRS agar plate containing 5 µg/ml erythromycin agar plate and grown anaerobically for about 48 h at 37°C. Each data are shown colony forming unit (cfu) per ml of sample. The experiment was performed three times, and results are shown as mean  $\pm$ 1 SD. No *L. paracasei* BL23-pIAV7 and BL-23-1E4 were found at 336 h after oral administration.
